# Supplementary material for: Single molecule magnet behavior and magnetic refrigeration of four tetranuclear lanthanide (Ln = GdIII, TbIII, DyIII) clusters
Source: Royal Society of Chemistry journal article supplement (doi:10.1039/c9nj04260a), 2019-01-01
Supplement: c9nj04260a1.pdf [file c9nj04260a1.pdf]

# Single molecule magnet behavior and magnetic refrigeration of four tetranuclear lanthanide (Ln = Gd<sup>III</sup>, Tb<sup>III</sup>, Dy<sup>III</sup>) clusters

Hong Yu,<sup>a</sup> Jia-Miao Cao,<sup>a</sup> Jun-Rui Zhang,<sup>a</sup> Rui-Cong Li,<sup>a</sup> Yan

Cheng,<sup>a</sup> Chen Yang,<sup>a</sup> Yin-Ling Hou,<sup>b</sup> \* Ming Fang,<sup>a,c,\*</sup>

*a* Department of Chemistry, Hebei Normal University of Science & Technology, Qinhuangdao 066004, Hebei province, P. R.China. E-mail:fangmingchem@163.com

*b* School of Life and Health Science, Kaili University, Kaili, 556011, China, hyl0506@126.com

*c* Key Laboratory of Advanced Energy Materials Chemistry (Ministry of Education), College of Chemistry, Nankai University, Tianjin 300071, China

## Electronic supplementary information

**Table S1** Selected bond lengths (Å) and angles (°) for complex **1**<sup>a</sup>

|                   |            |                 |            |
|-------------------|------------|-----------------|------------|
| Gd(1)-O(1)        | 2.380(3)   | Gd(1)-O(2)      | 2.409(4)   |
| Gd(1)-O(3)        | 2.438(4)   | Gd(1)-O(4)      | 2.361(4)   |
| Gd(1)-O(5)        | 2.330(4)   | Gd(1)-O(8)      | 2.399(3)   |
| Gd(1)-O(8)#1      | 2.443(4)   | Gd(1)-N(2)      | 2.579(5)   |
| Gd(2)-O(1)        | 2.423(3)   | Gd(2)-O(2)#1    | 2.408(4)   |
| Gd(2)-O(3)#1      | 2.401(4)   | Gd(2)-O(6)      | 2.350(4)   |
| Gd(2)-O(7)        | 2.323(4)   | Gd(2)-O(8)      | 2.336(3)   |
| Gd(2)-N(4)#1      | 2.589(5)   | Gd(2)-N(6)#1    | 2.561(5)   |
| Gd(1)-Gd(1)#1     | 3.9311(5)  | Gd(1)-Gd(2)     | 3.9249(4)  |
| Gd(1)-Gd(2)#1     | 3.6060(4)  |                 |            |
| O(1)-Gd(1)-O(2)   | 145.78(12) | O(1)-Gd(1)-O(3) | 143.57(13) |
| O(1)-Gd(1)-O(8)#1 | 100.84(12) | O(1)-Gd(1)-O(8) | 68.99(12)  |
| O(1)-Gd(1)-N(2)   | 65.67(13)  | O(2)-Gd(1)-O(3) | 66.43(12)  |
| O(2)-Gd(1)-O(8)#1 | 71.28(12)  | O(2)-Gd(1)-N(2) | 137.85(13) |
| O(3)-Gd(1)-O(8)#1 | 69.49(12)  | O(3)-Gd(1)-N(2) | 77.90(13)  |
| O(4)-Gd(1)-O(1)   | 81.94(13)  | O(4)-Gd(1)-O(2) | 125.37(13) |
| O(4)-Gd(1)-O(3)   | 85.56(13)  | O(4)-Gd(1)-O(8) | 141.10(13) |
| O(4)-Gd(1)-O(8)#1 | 141.63(12) | O(4)-Gd(1)-N(2) | 70.61(14)  |
| O(5)-Gd(1)-O(1)   | 90.22(14)  | O(5)-Gd(1)-O(2) | 81.23(13)  |
| O(5)-Gd(1)-O(3)   | 118.03(14) | O(5)-Gd(1)-O(4) | 71.88(13)  |
| O(5)-Gd(1)-O(8)#1 | 145.54(12) | O(5)-Gd(1)-O(8) | 82.64(13)  |
| O(5)-Gd(1)-N(2)   | 137.59(14) | O(8)-Gd(1)-O(2) | 77.05(12)  |

|                     |            |                     |            |
|---------------------|------------|---------------------|------------|
| O(8)-Gd(1)-O(3)     | 132.98(12) | O(8)-Gd(1)-O(8)#1   | 71.45(13)  |
| O(8)-Gd(1)-N(2)     | 116.31(13) | O(8)#1-Gd(1)-N(2)   | 75.82(13)  |
| O(1)-Gd(2)-N(4)#1   | 82.37(13)  | O(1)-Gd(2)-N(6)#1   | 156.61(13) |
| O(2)#1-Gd(2)-O(1)   | 77.60(13)  | O(2)#1-Gd(2)-N(4)#1 | 65.22(13)  |
| O(2)#1-Gd(2)-N(6)#1 | 105.85(14) | O(3)#1-Gd(2)-O(1)   | 133.32(12) |
| O(3)#1-Gd(2)-O(2)#1 | 67.02(13)  | O(3)#1-Gd(2)-N(4)#1 | 107.59(14) |
| O(3)#1-Gd(2)-N(6)#1 | 66.32(13)  | O(6)-Gd(2)-O(1)     | 117.44(13) |
| O(6)-Gd(2)-O(2)#1   | 142.48(13) | O(6)-Gd(2)-O(3)#1   | 79.77(14)  |
| O(6)-Gd(2)-N(4)#1   | 145.83(14) | O(6)-Gd(2)-N(6)#1   | 74.25(15)  |
| O(7)-Gd(2)-O(1)     | 82.79(13)  | O(7)-Gd(2)-O(2)#1   | 144.49(13) |
| O(7)-Gd(2)-O(3)#1   | 142.61(13) | O(7)-Gd(2)-O(6)     | 73.01(13)  |
| O(7)-Gd(2)-O(8)     | 126.33(13) | O(7)-Gd(2)-N(4)#1   | 83.15(15)  |
| O(7)-Gd(2)-N(6)#1   | 81.74(15)  | O(8)-Gd(2)-O(1)     | 69.29(12)  |
| O(8)-Gd(2)-O(2)#1   | 73.14(12)  | O(8)-Gd(2)-O(3)#1   | 71.91(12)  |
| O(8)-Gd(2)-O(6)     | 80.54(13)  | O(8)-Gd(2)-N(4)#1   | 133.63(13) |
| O(8)-Gd(2)-N(6)#1   | 134.08(13) | N(6)#1-Gd(2)-N(4)#1 | 78.46(15)  |

<sup>a</sup>Symmetry transformations used to generate equivalent atoms: #1 -x,-y+1,-z-1

**Table S2** Selected bond lengths (Å) and angles (°) for complex **2<sup>a</sup>**

|                   |            |                   |           |
|-------------------|------------|-------------------|-----------|
| Tb(1)-O(1)        | 2.370(7)   | Tb(1)-O(2)        | 2.397(7)  |
| Tb(1)-O(3)#1      | 2.404(6)   | Tb(1)-O(4)        | 2.329(8)  |
| Tb(1)-O(5)        | 2.318(7)   | Tb(1)-O(8)        | 2.322(6)  |
| Tb(1)-N(1)        | 2.548(8)   | Tb(1)-N(3)        | 2.552(8)  |
| Tb(2)-O(1)        | 2.388(6)   | Tb(2)-O(2)        | 2.398(7)  |
| Tb(2)-O(3)        | 2.385(6)   | Tb(2)-O(6)        | 2.300(10) |
| Tb(2)-O(7)        | 2.342(9)   | Tb(2)-O(8)#1      | 2.346(6)  |
| Tb(2)-O(8)        | 2.423(7)   | Tb(2)-N(5)        | 2.546(9)  |
| Tb(1)-Tb(2)       | 3.6052(8)  | Tb(1)-Tb(2)#1     | 3.8645(7) |
| Tb(2)-Tb(2)#1     | 3.8755(10) |                   |           |
| O(1)-Tb(1)-O(2)   | 66.1(3)    | O(1)-Tb(1)-O(3)#1 | 78.3(2)   |
| O(1)-Tb(1)-N(1)   | 66.3(2)    | O(1)-Tb(1)-N(3)   | 103.2(3)  |
| O(2)-Tb(1)-O(3)#1 | 133.2(2)   | O(2)-Tb(1)-N(1)   | 110.1(3)  |
| O(2)-Tb(1)-N(3)   | 66.4(2)    | O(3)#1-Tb(1)-N(1) | 79.8(2)   |
| O(3)#1-Tb(1)-N(3) | 155.2(2)   | O(4)-Tb(1)-O(1)   | 144.6(2)  |
| O(4)-Tb(1)-O(2)   | 142.1(2)   | O(4)-Tb(1)-O(3)#1 | 83.6(2)   |
| O(4)-Tb(1)-N(1)   | 80.7(3)    | O(4)-Tb(1)-N(3)   | 81.4(3)   |
| O(5)-Tb(1)-O(1)   | 141.8(3)   | O(5)-Tb(1)-O(2)   | 79.1(3)   |
| O(5)-Tb(1)-O(3)#1 | 119.2(3)   | O(5)-Tb(1)-O(4)   | 73.5(3)   |
| O(5)-Tb(1)-O(8)   | 82.2(3)    | O(5)-Tb(1)-N(1)   | 145.2(3)  |
| O(5)-Tb(1)-N(3)   | 75.0(3)    | O(8)-Tb(1)-O(1)   | 72.1(2)   |
| O(8)-Tb(1)-O(2)   | 70.5(2)    | O(8)-Tb(1)-O(3)#1 | 70.3(2)   |

|                   |          |                   |          |
|-------------------|----------|-------------------|----------|
| O(8)-Tb(1)-O(4)   | 129.2(3) | O(8)-Tb(1)-N(1)   | 132.6(2) |
| O(8)-Tb(1)-N(3)   | 134.1(2) | N(1)-Tb(1)-N(3)   | 78.4(3)  |
| O(1)-Tb(2)-O(2)   | 65.8(2)  | O(1)-Tb(2)-O(8)   | 70.1(2)  |
| O(1)-Tb(2)-N(5)   | 135.0(3) | O(2)-Tb(2)-O(8)   | 68.8(2)  |
| O(2)-Tb(2)-N(5)   | 76.5(2)  | O(3)-Tb(2)-O(1)   | 147.2(2) |
| O(3)-Tb(2)-O(2)   | 142.9(2) | O(3)-Tb(2)-O(8)   | 102.3(2) |
| O(3)-Tb(2)-N(5)   | 66.5(2)  | O(6)-Tb(2)-O(1)   | 82.9(3)  |
| O(6)-Tb(2)-O(2)   | 120.4(3) | O(6)-Tb(2)-O(3)   | 88.2(3)  |
| O(6)-Tb(2)-O(7)   | 72.6(4)  | O(6)-Tb(2)-O(8)   | 144.8(3) |
| O(6)-Tb(2)-O(8)#1 | 81.3(3)  | O(6)-Tb(2)-N(5)   | 139.6(3) |
| O(7)-Tb(2)-O(1)   | 127.8(3) | O(7)-Tb(2)-O(2)   | 87.8(3)  |
| O(7)-Tb(2)-O(3)   | 78.3(2)  | O(7)-Tb(2)-O(8)#1 | 139.4(3) |
| O(7)-Tb(2)-O(8)   | 142.2(3) | O(7)-Tb(2)-N(5)   | 71.6(3)  |
| O(8)#1-Tb(2)-O(1) | 77.3(2)  | O(8)#1-Tb(2)-O(2) | 132.6(2) |
| O(8)#1-Tb(2)-O(3) | 70.2(2)  | O(8)#1-Tb(2)-O(8) | 71.3(3)  |
| O(8)#1-Tb(2)-N(5) | 115.6(2) | O(8)-Tb(2)-N(5)   | 74.1(3)  |

<sup>a</sup>Symmetry transformations used to generate equivalent atoms: #1 -x+1,-y+1,-z+2

**Table S3** Selected bond lengths (Å) and angles (°) for complex **3<sup>a</sup>**

|                 |            |                 |           |
|-----------------|------------|-----------------|-----------|
| Dy(1)-O(1)      | 2.353(7)   | Dy(1)-O(2)      | 2.426(8)  |
| Dy(1)-O(3)      | 2.401(7)   | Dy(1)-O(4)      | 2.333(7)  |
| Dy(1)-O(5)      | 2.294(7)   | Dy(1)-O(8)      | 2.406(7)  |
| Dy(1)-O(8)#1    | 2.344(7)   | Dy(1)-N(1)      | 2.527(7)  |
| Dy(2)-O(1)#1    | 2.399(8)   | Dy(2)-O(2)      | 2.356(7)  |
| Dy(2)-O(3)      | 2.379(7)   | Dy(2)-O(6)      | 2.271(7)  |
| Dy(2)-O(7)      | 2.341(7)   | Dy(2)-O(8)      | 2.313(7)  |
| Dy(2)-N(3)      | 2.600(10)  | Dy(2)-N(5)      | 2.530(9)  |
| Dy(1)-Dy(1)#1   | 3.8221(11) | Dy(1)-Dy(2)#1   | 3.8780(8) |
| Dy(1)-Dy(2)     | 3.5784(8)  |                 |           |
| Dy(3)-O(9)      | 2.365(7)   | Dy(3)-O(10)     | 2.391(7)  |
| Dy(3)-O(11)     | 2.430(7)   | Dy(3)-O(12)     | 2.343(7)  |
| Dy(3)-O(13)     | 2.316(8)   | Dy(3)-O(16)#2   | 2.382(7)  |
| Dy(3)-O(16)     | 2.367(7)   | Dy(3)-N(7)      | 2.551(8)  |
| Dy(4)-O(9)#2    | 2.404(8)   | Dy(4)-O(10)     | 2.360(7)  |
| Dy(4)-O(11)     | 2.398(7)   | Dy(4)-O(14)     | 2.331(7)  |
| Dy(4)-O(15)     | 2.280(8)   | Dy(4)-O(16)#2   | 2.314(7)  |
| Dy(4)-N(9)      | 2.549(8)   | Dy(4)-N(11)     | 2.557(9)  |
| Dy(3)-Dy(3)#2   | 3.8674(11) | Dy(3)-Dy(4)#2   | 3.8799(8) |
| Dy(3)-Dy(4)     | 3.5797(9)  |                 |           |
| O(1)-Dy(1)-O(2) | 146.1(2)   | O(1)-Dy(1)-O(3) | 144.6(2)  |
| O(1)-Dy(1)-O(8) | 103.6(3)   | O(1)-Dy(1)-N(1) | 67.2(2)   |

---

|                     |          |                     |          |
|---------------------|----------|---------------------|----------|
| O(2)-Dy(1)-N(1)     | 79.2(2)  | O(3)-Dy(1)-O(2)     | 66.2(2)  |
| O(3)-Dy(1)-O(8)     | 69.7(2)  | O(3)-Dy(1)-N(1)     | 136.3(2) |
| O(4)-Dy(1)-O(1)     | 80.6(3)  | O(4)-Dy(1)-O(2)     | 84.7(3)  |
| O(4)-Dy(1)-O(3)     | 127.7(2) | O(4)-Dy(1)-O(8)#1   | 141.2(2) |
| O(4)-Dy(1)-O(8)     | 139.8(2) | O(4)-Dy(1)-N(1)     | 71.3(3)  |
| O(5)-Dy(1)-O(1)     | 89.5(2)  | O(5)-Dy(1)-O(2)     | 115.1(2) |
| O(5)-Dy(1)-O(3)     | 81.1(2)  | O(5)-Dy(1)-O(4)     | 73.2(2)  |
| O(5)-Dy(1)-O(8)     | 145.6(2) | O(5)-Dy(1)-O(8)#1   | 82.9(2)  |
| O(5)-Dy(1)-N(1)     | 140.0(2) | O(8)#1-Dy(1)-O(1)   | 68.9(2)  |
| O(8)#1-Dy(1)-O(2)   | 133.7(2) | O(8)-Dy(1)-O(2)     | 69.7(3)  |
| O(8)#1-Dy(1)-O(3)   | 76.1(2)  | O(8)#1-Dy(1)-O(8)   | 72.9(3)  |
| O(8)-Dy(1)-N(1)     | 73.8(2)  | O(8)#1-Dy(1)-N(1)   | 115.0(3) |
| O(1)#1-Dy(2)-N(3)   | 158.8(3) | O(1)#1-Dy(2)-N(5)   | 83.5(3)  |
| O(2)-Dy(2)-O(1)#1   | 133.2(3) | O(2)-Dy(2)-O(3)     | 67.7(2)  |
| O(2)-Dy(2)-N(3)     | 65.4(3)  | O(2)-Dy(2)-N(5)     | 106.6(3) |
| O(3)-Dy(2)-O(1)#1   | 76.2(2)  | O(3)-Dy(2)-N(3)     | 109.2(3) |
| O(3)-Dy(2)-N(5)     | 66.0(3)  | O(6)-Dy(2)-O(1)#1   | 83.2(3)  |
| O(6)-Dy(2)-O(2)     | 142.8(3) | O(6)-Dy(2)-O(3)     | 143.0(2) |
| O(6)-Dy(2)-O(7)     | 74.1(2)  | O(6)-Dy(2)-O(8)     | 128.0(3) |
| O(6)-Dy(2)-N(3)     | 80.9(3)  | O(6)-Dy(2)-N(5)     | 81.5(3)  |
| O(7)-Dy(2)-O(1)#1   | 115.8(3) | O(7)-Dy(2)-O(2)     | 81.0(2)  |
| O(7)-Dy(2)-O(3)     | 142.8(2) | O(7)-Dy(2)-N(3)     | 72.9(3)  |
| O(7)-Dy(2)-N(5)     | 146.1(3) | O(8)-Dy(2)-O(1)#1   | 68.6(2)  |
| O(8)-Dy(2)-O(2)     | 72.5(3)  | O(8)-Dy(2)-O(3)     | 71.7(2)  |
| O(8)-Dy(2)-O(7)     | 80.2(2)  | O(8)-Dy(2)-N(3)     | 132.6(3) |
| O(8)-Dy(2)-N(5)     | 133.7(3) | N(5)-Dy(2)-N(3)     | 80.4(3)  |
| O(9)-Dy(3)-O(10)    | 145.7(2) | O(9)-Dy(3)-O(11)    | 145.1(2) |
| O(9)-Dy(3)-O(16)    | 69.3(2)  | O(9)-Dy(3)-O(16)#2  | 103.5(3) |
| O(9)-Dy(3)-N(7)     | 66.6(3)  | O(10)-Dy(3)-O(11)   | 66.3(2)  |
| O(10)-Dy(3)-N(7)    | 136.8(3) | O(11)-Dy(3)-N(7)    | 78.7(3)  |
| O(12)-Dy(3)-O(9)    | 87.1(3)  | O(12)-Dy(3)-O(10)   | 81.8(3)  |
| O(12)-Dy(3)-O(11)   | 119.0(3) | O(12)-Dy(3)-O(16)   | 81.2(3)  |
| O(12)-Dy(3)-O(16)#2 | 143.8(2) | O(12)-Dy(3)-N(7)    | 139.5(3) |
| O(13)-Dy(3)-O(9)    | 82.5(3)  | O(13)-Dy(3)-O(10)   | 124.0(3) |
| O(13)-Dy(3)-O(11)   | 83.8(3)  | O(13)-Dy(3)-O(12)   | 72.8(3)  |
| O(13)-Dy(3)-O(16)#2 | 142.2(2) | O(13)-Dy(3)-O(16)   | 142.5(3) |
| O(13)-Dy(3)-N(7)    | 73.6(3)  | O(16)#2-Dy(3)-O(10) | 69.9(2)  |
| O(16)-Dy(3)-O(10)   | 76.9(2)  | O(16)#2-Dy(3)-O(11) | 70.0(2)  |
| O(16)-Dy(3)-O(11)   | 133.2(2) | O(16)-Dy(3)-O(16)#2 | 70.9(3)  |
| O(16)-Dy(3)-N(7)    | 114.2(3) | O(16)#2-Dy(3)-N(7)  | 74.8(2)  |
| O(9)#2-Dy(4)-N(9)   | 82.4(3)  | O(9)#2-Dy(4)-N(11)  | 156.9(2) |
| O(10)-Dy(4)-O(9)#2  | 78.8(2)  | O(10)-Dy(4)-O(11)   | 67.3(2)  |
| O(10)-Dy(4)-N(9)    | 65.9(3)  | O(10)-Dy(4)-N(11)   | 106.5(2) |
| O(11)-Dy(4)-O(9)#2  | 134.6(2) | O(11)-Dy(4)-N(9)    | 108.4(3) |

---

|                     |          |                      |          |
|---------------------|----------|----------------------|----------|
| O(11)-Dy(4)-N(11)   | 65.8(3)  | O(14)-Dy(4)-O(9)#2   | 114.7(3) |
| O(14)-Dy(4)-O(10)   | 141.7(3) | O(14)-Dy(4)-O(11)    | 80.0(3)  |
| O(14)-Dy(4)-N(9)    | 147.4(3) | O(14)-Dy(4)-N(11)    | 75.4(3)  |
| O(15)-Dy(4)-O(9)#2  | 83.8(3)  | O(15)-Dy(4)-O(10)    | 144.2(2) |
| O(15)-Dy(4)-O(11)   | 140.6(3) | O(15)-Dy(4)-O(14)    | 74.1(3)  |
| O(15)-Dy(4)-O(16)#2 | 130.1(3) | O(15)-Dy(4)-N(9)     | 81.0(3)  |
| O(15)-Dy(4)-N(11)   | 79.2(3)  | O(16)#2-Dy(4)-O(9)#2 | 69.5(2)  |
| O(16)#2-Dy(4)-O(10) | 71.7(2)  | O(16)#2-Dy(4)-O(11)  | 71.7(2)  |
| O(16)#2-Dy(4)-O(14) | 79.8(3)  | O(16)#2-Dy(4)-N(9)   | 132.7(3) |
| O(16)#2-Dy(4)-N(11) | 133.6(2) | N(9)-Dy(4)-N(11)     | 79.6(3)  |

<sup>a</sup>Symmetry transformations used to generate equivalent atoms: #1 -x-1,-y,-z; #2 -x,-y,-z+1

**Table S4** Selected bond lengths (Å) and angles (°) for complex 4<sup>a</sup>

|                   |            |                   |            |
|-------------------|------------|-------------------|------------|
| Gd(1)-O(3)        | 2.378(4)   | Gd(1)-O(1)        | 2.392(4)   |
| Gd(1)-O(2)        | 2.435(4)   | Gd(1)-O(8)        | 2.446(4)   |
| Gd(1)-O(8)#1      | 2.399(4)   | Gd(1)-O(7)        | 2.360(4)   |
| Gd(1)-O(6)        | 2.322(4)   | Gd(1)-N(6)        | 2.585(5)   |
| Gd(2)-O(3)#1      | 2.421(4)   | Gd(2)-O(1)        | 2.403(4)   |
| Gd(2)-O(2)        | 2.401(4)   | Gd(2)-O(8)        | 2.321(4)   |
| Gd(2)-O(5)        | 2.310(4)   | Gd(2)-N(2)        | 2.564(5)   |
| Gd(2)-N(4)        | 2.559(5)   | Gd(2)-O(4)        | 2.382(4)   |
| O(3)-Gd(1)-O(1)   | 145.24(13) | O(3)-Gd(1)-O(2)   | 144.70(13) |
| O(3)-Gd(1)-O(8)   | 99.76(14)  | O(3)-Gd(1)-O(8)#1 | 69.45(13)  |
| O(3)-Gd(1)-N(6)   | 65.64(14)  | O(1)-Gd(1)-O(2)   | 65.71(13)  |
| O(1)-Gd(1)-O(8)   | 71.19(14)  | O(1)-Gd(1)-O(8)#1 | 75.96(14)  |
| O(1)-Gd(1)-N(6)   | 137.90(14) | O(2)-Gd(1)-O(8)   | 71.05(13)  |
| O(2)-Gd(1)-N(6)   | 79.07(14)  | O(8)#1-Gd(1)-O(2) | 132.46(13) |
| O(8)#1-Gd(1)-O(8) | 70.72(17)  | O(8)#1-Gd(1)-N(6) | 117.24(15) |
| O(8)-Gd(1)-N(6)   | 76.21(15)  | O(7)-Gd(1)-O(3)   | 82.60(14)  |
| O(7)-Gd(1)-O(1)   | 125.62(14) | O(7)-Gd(1)-O(2)   | 85.16(14)  |
| O(7)-Gd(1)-O(8)#1 | 141.73(14) | O(7)-Gd(1)-O(8)   | 141.95(14) |
| O(7)-Gd(1)-N(6)   | 70.28(15)  | O(6)-Gd(1)-O(3)   | 91.06(14)  |
| O(6)-Gd(1)-O(1)   | 81.08(13)  | O(6)-Gd(1)-O(2)   | 116.25(14) |
| O(6)-Gd(1)-O(8)#1 | 82.65(15)  | O(6)-Gd(1)-O(8)   | 145.19(14) |
| O(6)-Gd(1)-O(7)   | 71.96(14)  | O(6)-Gd(1)-N(6)   | 137.56(14) |
| O(3)#1-Gd(2)-N(2) | 80.78(14)  | O(3)#1-Gd(2)-N(4) | 155.83(14) |
| O(1)-Gd(2)-O(3)#1 | 77.17(13)  | O(1)-Gd(2)-N(2)   | 64.94(14)  |
| O(1)-Gd(2)-N(4)   | 108.70(15) | O(2)-Gd(2)-O(3)#1 | 134.20(13) |
| O(2)-Gd(2)-O(1)   | 66.07(13)  | O(2)-Gd(2)-N(2)   | 105.67(15) |
| O(2)-Gd(2)-N(4)   | 66.49(15)  | O(8)-Gd(2)-O(3)#1 | 69.98(14)  |

|                 |            |                   |            |
|-----------------|------------|-------------------|------------|
| O(8)-Gd(2)-O(1) | 73.17(14)  | O(8)-Gd(2)-O(2)   | 73.81(14)  |
| O(8)-Gd(2)-N(2) | 133.10(16) | O(8)-Gd(2)-N(4)   | 134.12(15) |
| O(8)-Gd(2)-O(4) | 78.21(15)  | O(5)-Gd(2)-O(3)#1 | 82.51(14)  |
| O(5)-Gd(2)-O(1) | 146.34(14) | O(5)-Gd(2)-O(2)   | 142.33(14) |
| O(5)-Gd(2)-O(8) | 124.08(15) | O(5)-Gd(2)-N(2)   | 85.63(15)  |
| O(5)-Gd(2)-N(4) | 80.55(16)  | O(5)-Gd(2)-O(4)   | 73.35(14)  |
| N(4)-Gd(2)-N(2) | 80.85(16)  | O(4)-Gd(2)-O(3)#1 | 118.00(14) |
| O(4)-Gd(2)-O(1) | 140.16(14) | O(4)-Gd(2)-O(2)   | 79.79(14)  |
| O(4)-Gd(2)-N(2) | 148.67(15) | O(4)-Gd(2)-N(4)   | 73.11(15)  |

<sup>a</sup>Symmetry transformations used to generate equivalent atoms: #1 -x+2,-y+2,-z+1

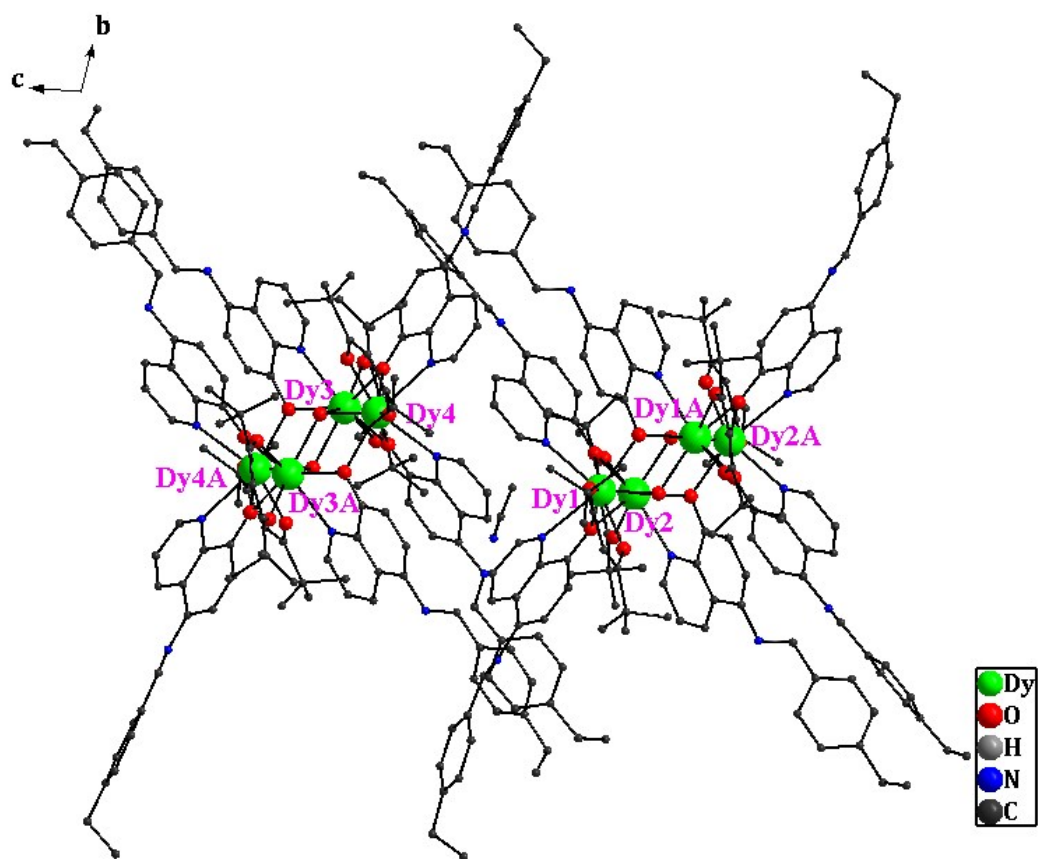

**Figure S1.** The two distinct tetranuclear units in the centrosymmetric unit in **3**.
